# Supplementary material
Source: publisher figshare collection journal article supplement (https://frontiersin.figshare.com/ndownloader/files/30920497)
Supplement: Supplementary file 1 [file 30920497]

Supplementary Table 1:Validity assessment of TAV seed systems studies

| **Authors** | **Title** | **Description of study populations** | **Sample size justification** | **Appropriate analytic techniques** | **Fact-based outcomes** | **Strength of evidence** |
| --- | --- | --- | --- | --- | --- | --- |
| Onim and Mwaniki (2008) | Cataloguing and evaluation of available community/farmers-based seed enterprises on African Indigenous Vegetables (AIVs) four ECA countries | No | No | Not clear | Yes | Low |
| Karanja et al. (2011) | Promoting farmer‐led seed enterprises of African indigenous vegetables to boost household incomes and nutrition in Kenya and Tanzania | No | No | No | Yes | Low |
| Afari-Sefa et al. (2013) | Private Contracting versus Community Seed Production Systems: Experiences from Farmer-Led Seed Enterprise Development of Indigenous Vegetables in Tanzania | Yes | No | Not clear | Yes | Moderate |
| Kimenye (2014) | Improving access to quality seeds in Africa | Yes | No | No | Yes | Moderate |
| Kansiime et al. (2016) | Good seed for quality produce: indigenous vegetables boost farmer  incomes and livelihoods in Tanzania | Yes | No | No | Yes |  |
| Rajendrana et al. (2016) | Farmer-led Seed Enterprise Initiatives to Access Certified Seed for Traditional African Vegetables and its Effect on Incomes in Tanzania | Yes | No | Yes | Yes | Moderate |
| Kansiime et al. (2018) | Derived demand for African indigenous vegetable seed: implications for farmer-seed entrepreneurship development | Yes | Yes | Yes | Yes | Moderate |
| Pincus et al. (2018) | African Indigenous Vegetable Seed Systems in Western Kenya | Yes | Yes | Yes | Yes | Moderate |
| Croft et al. (2018) | Formal and Informal Seed Systems in Kenya: Supporting Indigenous Vegetable Seed Quality | Yes | Yes | Yes | Yes | Strong |
| Kimaru et al. (2019) | Evaluation of the quality status of African nightshade seed produced by farmers in Kenya | Yes | Yes | Yes | Yes | Moderate |
| Kansiime et al. (2021) | Assessing sustainability factors of farmer seed production: a case of the Good Seed Initiative project in Tanzania | Yes | No | Yes | Yes | Moderate |
| Mvungi et al. (2020) | Profitability Analysis of Traditional African Vegetable Seeds Production in Kenya | Yes | No | Yes | Yes | Moderate |
| Ndinya et al. (2020) | Assessment of Seed Quality of Selected African Leafy Vegetables Produced in Western Kenya using informal and semi-formal seed systems | Yes | Not clear | Yes | Yes | Moderate |
